1  
2  
3  
4  
5  
6  
7  
8  
9  
10  
11  
12  
13  
14  
15  
16  
17  
18  
19  
20  
21  
22  
23  
24

**Fitness determinants of vancomycin-resistant *Enterococcus faecium* during growth in human serum**

Xinglin Zhang<sup>1, 2†</sup>, Ana M. Guzman Prieto<sup>2†</sup>, Vincent de Maat<sup>2</sup>, Tomasz K. Prajsnar<sup>3</sup>,  
Jumamurat R. Bayjanov<sup>2</sup>, Mark de Been<sup>2</sup>, Malbert R.C. Rogers<sup>2</sup>, Marc J.M. Bonten<sup>2</sup>,  
Stéphane Mesnage<sup>3</sup>, Rob J.L. Willems<sup>2</sup>, Willem van Schaik<sup>2\*</sup>

<sup>1</sup>College of Biosystem Engineering and Food Science, Zhejiang University, Hangzhou 310058, China

<sup>2</sup>Department of Medical Microbiology, University Medical Center Utrecht, The Netherlands

<sup>3</sup>Krebs Institute, University of Sheffield, Firth Court, Western Bank, Sheffield S10 2TN, United Kingdom

<sup>†</sup>Both authors contributed equally.

\*Corresponding author: Department of Medical Microbiology, University Medical Center Utrecht, Heidelberglaan 100; Room G04.614, 3584 CX Utrecht, The Netherlands. Email: [w.vanschaik@umcutrecht.nl](mailto:w.vanschaik@umcutrecht.nl). Telephone: +31887556535. Fax: +31302541770.

25 **Abstract**

26

27 *Enterococcus faecium* is a commensal of the human gastrointestinal tract and a frequent cause  
28 of bloodstream infections in hospitalized patients. Here, we identify genes that contribute to  
29 growth of *E. faecium* in human serum. We first sequenced the genome of *E. faecium* E745, a  
30 vancomycin-resistant clinical isolate, to completion and then compared its transcriptome  
31 during exponential growth in rich medium and in human serum by RNA-seq. This analysis  
32 revealed that 27.8% of genes on the *E. faecium* E745 genome were differentially expressed in  
33 these two conditions. A gene cluster with a role in purine biosynthesis was among the most  
34 upregulated genes in *E. faecium* E745 upon growth in serum. A high-throughput transposon  
35 sequencing (Tn-seq) approach was used to identify conditionally essential genes in *E. faecium*  
36 E745 during growth in serum. Genes involved in *de novo* nucleotide biosynthesis (including  
37 *pyrK\_2*, *pyrF*, *purD*, *purH*) and a gene encoding a phosphotransferase system subunit  
38 (*manY\_2*) were thus identified to be contributing to *E. faecium* growth in human serum.  
39 Transposon mutants in *pyrK\_2*, *pyrF*, *purD*, *purH* and *manY\_2* were isolated from the library  
40 and their impaired growth in human serum was confirmed. In addition, the *pyrK\_2* and  
41 *manY\_2* mutants also exhibited significantly attenuated virulence in an intravenous zebrafish  
42 infection model. We conclude that genes involved in carbohydrate and nucleotide metabolism  
43 of *E. faecium* are essential for growth in human serum and contribute to the pathogenesis of  
44 this organism.

45

## 46 **Introduction**

47

48 Enterococci are commensals of the gastrointestinal tract of humans and animals, but some  
49 enterococcal species, particularly *E. faecium* and *E. faecalis*, are also common causes of  
50 hospital-acquired infections in immunocompromised patients (1). While *E. faecalis* has been  
51 recognized as an important nosocomial pathogen for over a century, *E. faecium* has emerged  
52 as a prominent cause of hospital-acquired infections over the last two decades (2). Since the  
53 1980s, *E. faecium* acquired resistance to multiple antibiotics, including  $\beta$ -lactams,  
54 aminoglycosides and finally, to the glycopeptide vancomycin (3). Nosocomial infections are  
55 almost exclusively caused by a specific sub-population of *E. faecium*, termed clade A-1,  
56 which has emerged from a background of human commensal and animal *E. faecium* strains  
57 (4). Strains in clade A-1 carry genetic elements that are absent from animal or human  
58 commensal isolates and which contribute to gut colonization or pathogenicity (5–9).  
59 *E. faecium* bloodstream infections frequently develop in patients undergoing  
60 immunosuppressive therapy, and can result from translocation of strains from the intestinal  
61 tract to the bloodstream (10). In addition, the use of intravenous catheters in hospitalized  
62 patients, is another risk factor for the introduction of *E. faecium* into the bloodstream (3, 11,  
63 12). Currently, *E. faecium* causes approximately 40% of enterococcal bacteremias. Due to the  
64 accumulation of antibiotic resistance determinants in clade A-1 strains, *E. faecium* infections  
65 are more difficult to treat than infections caused by *E. faecalis* or other enterococci (13–15).  
66 To cause bloodstream infections, *E. faecium* needs to be able to survive and multiply in blood,  
67 but the mechanisms by which it can do so, have not yet been studied. To thrive in the  
68 bloodstream, an opportunistic pathogen has to evade host immune mechanisms and to adjust  
69 its metabolism to an environment that is relatively poor in nutrients (16).

70 To identify genes that are conditionally essential in bacteria, high-throughput screening  
71 methods for transposon mutant libraries have been developed and optimized for many  
72 different bacterial species (17, 18). To perform high-throughput functional genomics in  
73 ampicillin-resistant, vancomycin-susceptible clinical *E. faecium* strains, we previously  
74 developed a microarray-based transposon mutagenesis screening method which was used to  
75 identify genes involved in the development of endocarditis (7), resistance to ampicillin (19),  
76 bile (20) and disinfectants (Guzman Prieto *et al.*, submitted for publication). However,  
77 microarray-based methods for transposon mutant library screening are limited in their  
78 accuracy and can only be used in strains for which the microarray was designed. To address  
79 these limitations, several methods, including Tn-seq (21) and TraDIS (22), which are based  
80 on high-throughput sequencing of the junctions of the transposon insertion sites and genomic  
81 DNA, have been developed (23).

82 In this study, we set-up Tn-seq in the clinical *E. faecium* isolate E745 to identify genes that  
83 contribute to survival and growth in human serum. In addition, we determined the  
84 transcriptional response of *E. faecium* E745 in that same environment. Finally, we  
85 substantiated the role of several *E. faecium* genes that contribute to growth in serum and in  
86 virulence, in a high-throughput zebrafish infection model. Collectively, our findings show that  
87 metabolic adaptations are key to *E. faecium* growth in serum and contribute to virulence.

88

## 89 **Materials and Methods**

### 90 **Bacterial strains, plasmids, and growth conditions**

91 The vancomycin-resistant *E. faecium* strain E745 was used throughout this study. This strain  
92 was isolated from feces of a hospitalized patient, during a VRE outbreak in a Dutch hospital  
93 (24, 25). Unless otherwise mentioned, *E. faecium* was grown in brain heart infusion broth  
94 (BHI; Oxoid) at 37°C. The *E. coli* strains DH5 $\alpha$  (Invitrogen) was grown in Luria-Bertani  
95 (LB) medium. When necessary, antibiotics were used at the following concentrations:  
96 chloramphenicol 4  $\mu\text{g ml}^{-1}$  for *E. faecium* and 10  $\mu\text{g ml}^{-1}$  for *E. coli*, and gentamicin 300  $\mu\text{g}$   
97  $\text{ml}^{-1}$  for *E. faecium* and 25  $\mu\text{g ml}^{-1}$  for *E. coli*. All antibiotics were obtained from Sigma-  
98 Aldrich. Growth was determined by measuring the optical density at 660 nm (OD<sub>660</sub>).

### 99 **Genome sequencing, assembly and bioinformatic analysis**

100 *E. faecium* E745 was sequenced using a combination of Illumina HiSeq 100 bp paired-end  
101 sequencing, long-read sequencing using the Pacific Biosciences RS II SMRT technology and  
102 the MinION system with R7 flowcell chemistry (Oxford Nanopore Technologies). Corrected  
103 PacBio reads were assembled using the Celera assembler (version 8.1) (26) and assembled  
104 contigs were then corrected by aligning Illumina reads using BWA (version 0.7.9a), with  
105 default parameters for index creation and BWA-MEM algorithm with *-M* option for the  
106 alignment (27). This approach resulted in 15 contigs, including one contig covering the entire  
107 2.77 Mbp chromosome. After discarding contigs with low-coverage, the remaining contigs  
108 constituted 5 circular plasmid sequences and 5 non-overlapping contigs. These 5 contigs were  
109 aligned against the NCBI Genbank database and all were found to be part of the *E. faecium*  
110 plasmid pMG1 (28). Based on this alignment the presumed order of contigs was determined  
111 and confirmed by gap-spanning PCRs and sequencing of the products. A single gap between  
112 two contigs, could not be closed by PCR. Thus, we assembled Illumina reads together with

113 MinION 2D reads using the SPAdes assembler (version 3.0) (29), which produced a contig  
114 that closed the gap, resulting in a complete assembly of this plasmid. Sequence coverage of  
115 chromosomal and plasmid sequences was determined with SAMtools (version 0.1.18) using  
116 short read alignments to the assembly, which were generated using BWA (version 0.7.9a).  
117 SAMtools was also used to identify possible base-calling and assembly errors, by aligning  
118 short reads to assembled contigs. A base was corrected using the consensus of aligned reads  
119 (30). The corrected sequences were annotated using Prokka (version 1.10) (31). The  
120 annotated genome of *E. faecium* E745 is available from NCBI Genbank database under  
121 accession numbers CP014529 – CP014535.

122

### 123 **Transcriptome profiling**

124 Approximately  $3 \times 10^7$  cfu of *E. faecium* E745 were inoculated into 14 ml of BHI broth and  
125 heat-inactivated serum, and grown at 37°C until log phase. Cultures were centrifuged at room  
126 temperature (15 s; 21.380 g), and pellets were flash frozen in liquid N<sub>2</sub> prior to RNA  
127 extraction, which was performed as described previously (19). The ScriptSeq Complete Kit  
128 (Bacteria) (Epicentre Biotechnologies, WI) was used for rRNA removal and strand-specific  
129 library construction. Briefly, rRNA was removed from 2.5 µg of total RNA. To generate  
130 strand specific RNA-seq data, approximately 100 ng of rRNA-depleted RNA was fragmented  
131 and reverse transcribed using random primers containing a 5' tagging sequence, followed by  
132 3' end tagging with a terminal-tagging oligo to yield di-tagged, single-stranded cDNA.  
133 Following magnetic-bead based purification, the di-tagged cDNA was amplified by PCR (15  
134 cycles) using ScriptSeq Index PCR Primers (Epicentre Biotechnologies, WI). Amplified  
135 RNA-seq libraries were purified using AMPure XP System (Beckman Coulter) and  
136 sequenced by a 100 bp paired end reads sequencing run using the Illumina HiSeq 2500

137 platform (University of Edinburgh, United Kingdom). Data analysis was performed using  
138 Rockhopper (32) using the default settings for strand specific analysis.

139

#### 140 **Confirmation of RNA-seq data by quantitative real-time RT-PCR (qRT-PCR).**

141 Total RNA isolated as described previously was used to confirm the transcriptome analysis by  
142 qRT-PCR. cDNA was synthesized as described above and qRT-PCR on these cDNAs was  
143 performed using the Maxima SYBR Green/ROX qPCR Master Mix (Thermo Scientific,  
144 Breda, The Netherlands) and a StepOnePlus instrument (Life Technologies). The expression  
145 of *tufA* was used as a housekeeping control. Ct values were calculated using the StepOne  
146 analysis software v2.2. Transcript levels, relative to *tufA*, of the assayed genes were calculated  
147 using REST 2009 V2.0.13 (Qiagen, Venlo, The Netherlands). This experiment was performed  
148 with three biological replicates.

149

#### 150 **Generation of *mariner* transposon mutant library in *E. faecium***

151 To create a transposon mutant library in *E. faecium* E745 suitable for Tn-seq, the *mariner*  
152 transposon cassette (carrying a gentamicin resistance gene) in the transposon delivery plasmid  
153 pZXL5 (19) was adapted as follows. The transposon from pZXL5 was amplified by PCR  
154 using the set of primers: pZXL5\_MmeI\_SacII\_Fw and pZXL5\_MmeI\_SacII\_Rv (primer  
155 sequences listed in Supplementary table 7). These primers introduced MmeI restriction sites  
156 in the inverted repeats on both sides of the transposon. The modified transposon delivery  
157 vector, termed pGPA1, was generated by the digestion of pZXL5 with SacII, followed by the  
158 insertion of the SacII-digested *mariner* transposon that contained MmeI restriction sites at its  
159 extreme ends. pGPA1 was electroporated into *E. faecium* E745 and the transposon mutant  
160 library was generated by selecting for gentamicin-resistant transposon mutants as described  
161 previously (19).

162

163 **Tn-seq analysis of conditionally essential genes in *E. faecium* E745**

164 The transposon mutant library created in E745 was prepared for Tn-seq analysis, similar to  
165 previously described procedures (33). To identify genes that are essential for the viability of  
166 *E. faecium* in BHI, we used ten experimental replicates of the mutant library. Aliquots (20  $\mu$ l)  
167 of the transposon mutant library, containing approximately  $10^7$  cfu, were used to inoculate 20  
168 ml BHI broth and grown overnight at 37°C. Subsequently, 1 ml aliquots of the cultures were  
169 spun down (15 s, 21.380 g) and used for the extraction of genomic DNA (Wizard genomic  
170 DNA purification kit, Promega Benelux). 2  $\mu$ g of the extracted DNA was digested for 4 hr at  
171 37°C using 10U MmeI (New England Biolabs) and immediately dephosphorylated with 1U of  
172 calf intestine alkaline phosphatase (Invitrogen) during 30 min at 50°C. DNA was isolated  
173 using phenol-chloroform extraction and subsequently precipitated using ethanol. The DNA  
174 pellets were then dissolved in 20  $\mu$ l water. The samples were barcoded and prepared for Tn-  
175 seq sequencing as described previously (33). The sequence reads from all ten experimental  
176 replicates were mapped to the genome, and the mapped read-counts were then tallied for the  
177 analysis of the essentiality of the genes in the *E. faecium* E745 genome (further described  
178 below).

179 To identify genes that are required for growth in human serum, 20  $\mu$ l aliquots of the frozen  
180 mutant library in E745 were inoculated in BHI broth and grown overnight as described above.  
181 Subsequently, bacterial cells were washed with physiological saline solution. Approximately  
182  $3 \times 10^7$  cfu were inoculated into 14 ml BHI broth, and approximately  $3 \times 10^6$  cfu were  
183 inoculated into 14 ml human serum obtained from Sigma (Cat. No. H4522; Sterile filtered  
184 type-AB human serum) or heat-inactivated human serum (the same, after incubation for 30  
185 min at 56°C). The different inoculum-sized were used in order for a similar number of  
186 divisions to occur during the experiment. Cells were incubated at 37°C for 24 hours without



187 shaking and then further processed for Tn-seq (33). This experiment was performed in  
188 triplicate.

189 Tn-seq samples were sequenced (50 nt, single-end) on one lane of a Illumina Hiseq 2500  
190 (Baseclear, Leiden, the Netherlands and Sequencing facility University Medical Center,  
191 Utrecht, The Netherlands), generating an average of 15 million high quality reads per sample.  
192

### 193 **Tn-seq data analysis**

194 Raw Illumina sequence reads from Illumina sequencing were split, based on their barcode,  
195 using the Galaxy platform (34), and 16-nucleotide fragments of each read that corresponded  
196 to E745 sequences, were mapped to the E745 genome using Bowtie 2 (35). The results of the  
197 alignment were sorted and counted by IGV (36) using a 25-nucleotide window size and then  
198 summed over the gene. Read mapping to the final 10% of a gene were discarded as these  
199 insertions may not inactivate gene function. Read counts per gene were then normalized to the  
200 total number of reads that mapped to the genome in each replicate, by calculating the  
201 normalized read-count RPKM (Reads Per Kilobases per Million input reads) via the following  
202 formula:  $RPKM = (\text{number of reads mapped to a gene} \times 10^6) / (\text{total mapped input reads in}$   
203  $\text{the sample} \times \text{gene length in kbp})$ . Statistical analysis of the RPKM-values between the  
204 experimental conditions was performed using Cyber-T (37). Genes were determined to be  
205 significantly contributing to growth in human serum when the Benjamini-Hochberg corrected  
206  $P$ -value was  $<0.05$  and the difference in abundance of the transposon mutant during growth in  
207 BHI and serum was  $>2$ . To determine the essentiality of *E. faecium* genes during growth in  
208 the rich medium BHI, the normalized read-counts of the ten replicates in BHI were used as  
209 data input for the EL-ARTIST analysis, as described in the user manual of the ARTIST  
210 pipeline (38).

211

## 212 **Isolation of mutants from the transposon mutant library pool**

213 To recover a targeted transposon mutant from the complete mutant pool, a PCR-based  
214 screening strategy was developed (Supplementary figure 3). 40 µl of the transposon mutant  
215 library was inoculated into 40 ml of BHI broth with gentamicin and grown overnight at 37°C  
216 with shaking (200 rpm). The overnight culture, containing approximately 10<sup>9</sup> cfu/ml, was  
217 then diluted to approximately 20 cfu/ml in 500 ml of BHI with gentamicin and kept on ice.  
218 Subsequently, 200 µl aliquots were transferred to wells of sterile 96 wells plates (n = 12,  
219 Corning Inc.). After overnight incubation at 37°C without shaking, aliquots (15 µl) of each  
220 one of the 96 wells, were further pooled into a single new 96 well plate, as described in  
221 Supplementary figure 3.

222 PCRs were performed on the final plate in which the transposon mutants were pooled, to  
223 check for the presence of the Tn-mutants of interest, using the primer  
224 ftp\_tn\_both\_ends\_MmeI, which is complementary to the repeats flanking the transposon  
225 sequence, in combination with a gene-specific primer (Supplementary table 7). When a PCR  
226 was found to be positive in one of the wells of this plate, the location of the Tn-mutant was  
227 tracked backwards to the wells containing approximately 4 independent transposon mutants,  
228 by performing PCRs mapping the presence of the transposon mutant in each step. Cells from  
229 the final positive well were plated onto BHI with gentamicin and colony PCR was performed  
230 to identify the desired transposon mutant.

231

## 232 **Growth of *E. faecium* E745 and individual mutants in human serum**

233 Wild-type E745 and the mutant strains were grown overnight at 37°C in BHI broth.  
234 Subsequently, bacterial cells were washed with physiological saline and approximately 3 x  
235 10<sup>5</sup> cfu were inoculated into 1.4 ml BHI broth or heat-inactivated serum. Cells were grown in

236 1.5 ml tubes (Eppendorf) in triplicate for each condition and incubated at 37°C for 24 hours  
237 without shaking. Bacterial growth was determined by assessing viable counts, for which the  
238 cultures were serially diluted using physiological saline solution and plated onto BHI agar  
239 followed by overnight incubation at 37°C.

240

#### 241 **Intravenous infection of zebrafish embryos**

242 London wild-type (LWT) inbred zebrafish embryos, provided by the aquarium staff of The  
243 Bateson Center (University of Sheffield), were used for infection experiments. The parental  
244 E745 strain and its *pyrK\_2* and *manY\_2* transposon mutants were grown in BHI broth until  
245 they reached an optical density at 600 nm of approximately 0.5 and were then harvested by  
246 centrifugation (5,500 g, 10 min). Bacteria were microinjected into the circulation of  
247 dechorionated zebrafish embryos at 30 hours post fertilization, as previously described (39).  
248 Briefly, anesthetized embryos were embedded in 3% (w/v) methylcellulose and injected  
249 individually with approximately  $1.2 \times 10^4$  cfu using microcapillary pipettes. For each strain,  
250 29 to 32 infected embryos were observed for survival up to 90 hours post infection (hpi). This  
251 experiment was performed in triplicate.

252

#### 253 **Data availability**

254 Sequence reads generated in this study have been made available at the European Nucleotide  
255 Archive under accession number PRJEB19025.

## 256 **Results**

257

### 258 **The complete genome sequence of *E. faecium* E745.**

259 In this study, we implemented RNA-seq and Tn-seq analyses in *E. faecium* strain E745, an  
260 ampicillin- and vancomycin-resistant clinical isolate that was isolated from faeces of a  
261 hospitalized patient during an outbreak of VRE in the nephrology ward of a Dutch hospital in  
262 2000 (24, 25). To allow the application of RNA-seq and Tn-seq in *E. faecium* E745, we first  
263 determined the complete genome sequence of this strain through a combination of short-read  
264 Illumina sequencing and long-read sequencing on the RSII Pacific Biosciences and Oxford  
265 NanoPore's MinION systems. This resulted in a circular chromosomal sequence of 2,765,010  
266 nt and 6 plasmids, with sizes ranging between 9.3 kbp and 223.7 kbp (Supplementary table 1).  
267 Together, the chromosome and plasmids have 3,095 predicted coding sequences.

268

### 269 **Transcriptome of *E. faecium* E745 during growth in rich medium and in human serum**

270 The transcriptional profile of E745 was determined using RNA-seq during growth in rich  
271 medium (BHI) and in heat-inactivated human serum. A total of 99.9 million (15.6 - 17.6  
272 million per sample) 100 bp paired-end reads were successfully aligned to the genome,  
273 allowing the quantification of rare transcripts (Fig. 1). A total of 3217 transcription units were  
274 identified, including 651 predicted multi-gene operons, of which the largest contains 22 genes  
275 (Fig. 1A and Supplementary table 2).

276 A comparative analysis of E745 during growth in BHI and in human serum, showed that 860  
277 genes exhibited significantly ( $q < 0.001$  and a fold change in expression of  $> 2$  or  $< 0.5$  between  
278 cultures grown in BHI versus heat-inactivated serum) different expression between these  
279 conditions (Supplementary table 3). The large number (27.8% of genes on the *E. faecium*  
280 E745 genome) of differentially expressed genes, indicates that growth in human serum leads

281 to a dramatic reprogramming of global *E. faecium* gene expression, involving both  
282 chromosomal and plasmid-located genes. Among the genes with the highest difference in  
283 expression between growth in serum and in rich medium, we identified a gene cluster with a  
284 role in purine biosynthesis (Fig. 1B). In addition, we found a 58.4 kbp prophage-like gene  
285 cluster that exhibited higher expression in E745 during growth in serum (Fig. 1C).  
286 To confirm the RNA-seq analysis, we independently determined expression levels of eight  
287 genes during growth in serum versus growth in BHI by qPCR (Supplementary Fig. 1). RNA-  
288 seq and qPCR data were highly concordant ( $r^2 = 0.98$ ).

289

### 290 **Construction and analysis of a transposon mutant library in *E. faecium* E745.**

291 A *mariner*-based transposon mutant library was generated in *E. faecium* E745 and Tn-seq  
292 (21) was performed on ten replicate transposon mutant libraries, that were grown overnight in  
293 BHI at 37°C, resulting in an average of 15 million Tn-seq reads for each library. To analyze  
294 the Tn-seq data, we divided the E745 genome in 25-nt windows. Of a total of 110,601  
295 windows, 49,984 (45%) 25-nt windows contained one or more sequence reads. No positional  
296 bias was observed in the transposon insertion sites in the chromosome and plasmids of *E.*  
297 *faecium* E745 (Supplementary Fig. 2A). The genome-wide coverage of this transposon  
298 mutant library allowed the identification of genes that are conditionally essential in *E.*  
299 *faecium*. A total of 455 chromosomal genes were determined to be essential for growth of *E.*  
300 *faecium* E745 in BHI (Supplementary Table 4). An example of a gene identified as essential  
301 is shown in Supplementary Fig. 2B. Among the genes that were essential for growth of *E.*  
302 *faecium* E745 in BHI, 87% were present in all genome sequences of a set of 74 previously  
303 sequenced *E. faecium* strains (4) that represented the genetic and ecological diversity of the  
304 species. An additional 7% of the essential genes were present in 73 out of 74 *E. faecium*  
305 genomes (data not shown). The conserved presence of these essential genes among diverse *E.*

306 *faecium* strains is in line with their crucial role in *E. faecium* viability. The *E. faecium* E745  
307 transposon mutant library was then used to identify genes that were specifically required for  
308 growth of *E. faecium* in serum.

309

### 310 ***E. faecium* E745 genes required for growth in human serum**

311 In order to identify genes that contribute to growth of *E. faecium* E745 in human serum, we  
312 performed Tn-seq on cultures of the *E. faecium* E745 transposon mutant libraries upon growth  
313 in rich medium (BHI) and in human serum. The human serum was either used natively or  
314 heat-treated. The serum showed effective complement activity in both classical and  
315 alternative pathways, as determined by hemolytic assays (40), while this activity was  
316 abolished by heat-inactivation (data not shown). Minor differences were observed among  
317 conditionally essential genes between the experiments performed in native human serum or  
318 heat-inactivated serum (Supplementary Table 5) and the following results correspond to the  
319 experiments obtained with heat-inactivated serum. This condition was chosen because it may  
320 be a more reproducible *in vitro* environment, particularly since the interaction between the  
321 complement system and Gram-positive bacteria remains to be fully elucidated (41, 42).

322 We identified 37 genes that significantly contributed to growth of E745 in human serum (Fig.  
323 2 and Supplementary table 6): twenty-nine genes were located on the chromosome and eight  
324 genes were present on plasmids (six genes on pE745-5, two genes on plasmid pE745-6). The  
325 relatively large number of genes identified indicates that growth of *E. faecium* in human  
326 serum is a multi-factorial process. The genes that conferred the most pronounced effect on  
327 growth of *E. faecium* in serum included genes that are part of a phosphotransferase systems  
328 (PTS) involved in carbohydrate uptake (*manZ\_3*, *manY\_2*, *ptsL*), a putative transcriptional  
329 regulator (*algB*) and genes involved in the biosynthesis of purine and pyrimidine nucleotides  
330 (*guaB*, *purA*, *pyrF*, *pyrK\_2*, *purD*, *purH*, *purL*, *purQ*, *purC*) (Fig. 2). Notably, the *purD*,

331 *purH*, and *purL* genes were found to exhibit higher expression upon growth in human serum  
332 in the RNA-seq analysis (Fig. 1). Nine genes were identified as negatively contributing to  
333 growth in serum, i.e. the transposon mutants in these genes were significantly enriched upon  
334 growth in serum. The effects of these mutations were relatively limited, compared to the  
335 major effects observed in the transposon mutants discussed above (Supplementary Table 6),  
336 but it is notable that five (*clsA\_1*, *ddcP*, *ldt<sub>fm</sub>*, *mgs*, and *lytA\_2*) of these genes have roles in  
337 cell wall and cytoplasmic membrane biosynthesis.

338

### 339 ***E. faecium* genes involved in nucleotide biosynthesis or carbohydrate metabolism** 340 **contribute to growth in human serum**

341 We developed a PCR-based method (Supplementary Fig. 3) to selectively isolate five  
342 transposon mutants (in the purine metabolism genes *purD* and *purH*, the pyrimidine  
343 metabolism genes *pyrF* and *pyrK\_2* and the PTS gene *manY\_2*) from the transposon library.  
344 Growth in rich medium of these transposon insertion mutants was equal to the parental strain.  
345 However, all mutants were significantly impaired in their growth in human serum (Fig. 3A),  
346 confirming the results of the Tn-seq experiments.

347

### 348 ***E. faecium pyrK\_2* and *manY\_2* contribute to intravenous infection of zebrafish**

349 Next, we investigated whether the transposon insertion mutants in the *manY\_2* and *pyrK\_2*  
350 genes were attenuated *in vivo* (Fig. 3B). The mutants in these genes were selected because  
351 they represent the mutants in nucleotide and carbohydrate metabolism genes that were  
352 previously shown to contribute to the growth of *E. faecium* in human serum. As a model for  
353 intravenous infection, we used a recently described model in which *E. faecium* was injected  
354 into the circulation of zebrafish embryos to mimic systemic infections (43). We showed that  
355 both the *manY\_2* and the *pyrK\_2* mutant were significantly less virulent than the parental

356 strain. The overall survival at 92 hours post infection (hpi) of zebrafish embryos infected with  
357 WT strain was 53%, compared to 88% and 83% respectively, for zebrafish embryos that were  
358 infected with the transposon insertion mutants in *manY\_2* and *pyrK\_2*.



## 359 Discussion

360 *E. faecium* can contaminate the skin and from there colonize indwelling devices such as  
361 intravenous catheters, or it can translocate from the gastrointestinal tract in  
362 immunosuppressed patients, leading to the development of bacteremia and endocarditis. *E.*  
363 *faecium* infections are often difficult to treat, due to the multi-drug resistant character of the  
364 strains causing nosocomial infections (3, 4). However, the bloodstream poses challenges for  
365 the proliferation and survival of *E. faecium*, including a scarcity of nutrients.

366 In the present study we sequenced the complete genome of a vancomycin-resistant *E. faecium*  
367 strain, and identified *E. faecium* genes that were essential for growth in human serum. A total  
368 of 37 genes were found to be required for fitness of *E. faecium* E745 in serum, among which  
369 genes with roles in carbohydrate uptake and nucleotide biosynthesis. Previously, fitness  
370 determinants for growth in human serum have been identified through large-scale screening  
371 of mutant libraries in both a Gram-negative (*Escherichia coli*) and a Gram-positive  
372 (*Streptococcus pyogenes*) pathogen (44, 45). Notably, these studies have also identified the  
373 ability for *de novo* synthesis of purines and pyrimidines as a crucial factor for growth in  
374 serum. In addition, in diverse bacteria (including *Burkholderia cepacia*, *Pasteurella*  
375 *multocida*, *Acinetobacter baumannii*, *Salmonella enterica* serovar Typhimurium, *Bacillus*  
376 *anthracis*, and *Streptococcus pneumoniae*), the ability to synthesize nucleotides contributes  
377 importantly to virulence (46–51). The data presented here indicate that *de novo* biosynthesis  
378 of nucleotides is also required for *E. faecium* growth in serum and virulence. The nucleotide  
379 biosynthesis pathway of *E. faecium* may be a promising target for the development of novel  
380 antimicrobials for the treatment of *E. faecium* bloodstream infections. Indeed, compounds that  
381 target guanine riboswitches, thereby inhibiting nucleotide biosynthesis, have already shown  
382 their efficacy in a *Staphylococcus aureus* infection model (52).

383 Three genes (*ptsL*, *manY\_2* and *manZ\_3*) encoding subunits of PTSs were found to contribute  
384 to growth in serum in our Tn-seq experiments. Previously, PTSs have been associated with  
385 gut colonization (5) and endocarditis (7) in another clinical *E. faecium* strain. The PTSs  
386 identified in this study are different from these previously characterized systems, suggesting  
387 that the remarkably large number of genes encoding for PTSs in a typical *E. faecium* genome  
388 (4) provide metabolic flexibility for growth in a wide variety of environments.

389 It is notable that among the nine genes that exhibited increased fitness upon inactivation by  
390 transposon insertion, five genes are predicted to have a role in cell wall or cytoplasmic  
391 membrane biosynthesis. The protein encoded by *ddcP* was previously characterized as a low-  
392 molecular-weight penicillin binding protein with D-alanyl-D-alanine carboxypeptidase  
393 activity (19), while *ldt<sub>fm</sub>* acts as a peptidoglycan L,D transpeptidase (53). The predicted  $\alpha$ -  
394 monoglucosyldiacylglycerol synthase gene *mgs* is orthologous (73% amino acid identity) to  
395 *bgsB* in *E. faecalis*, which is required for the biosynthesis of membrane glycolipids (54). The  
396 *clsA\_1* gene is predicted to be responsible for the synthesis of cardiolipin  
397 (bisphosphatidylglycerol) and its inactivation may modulate the physical properties of the  
398 cytoplasmic membrane (55). Finally, *lytA\_2* is predicted to encode an autolysin, which may  
399 be involved in the turnover of peptidoglycan in the cell wall (56). The transposon mutants in  
400 these genes were not further characterized in this study, but our findings suggest that genes  
401 involved in cell wall or cytoplasmic membrane remodeling may confer subtle fitness defects  
402 to *E. faecium* when growing in serum.

403 Our RNA-seq-based transcriptional profiling of *E. faecium* E745 during mid-exponential  
404 growth in serum showed pervasive changes in gene expression compared to exponential  
405 growth in rich medium. The purine metabolism genes *purL*, *purH*, *purD*, which were found to  
406 be required for growth in serum in our Tn-seq experiments, were among those that were  
407 significantly upregulated during growth in serum compared to growth in rich medium.

408 Notably, a single prophage was expressed at higher levels during growth in serum than in rich  
409 medium. The abundance of prophage elements in the genome of *E. faecium* has been noted  
410 before (4, 57, 58). Interestingly, in the related bacterium *Enterococcus faecalis* prophages  
411 encode platelet-binding proteins (59) and may have a role in intestinal colonization (60). The  
412 contribution of *E. faecium* prophages to traits that are important for colonization and infection  
413 may provide important insights into the success of *E. faecium* as a nosocomial pathogen.

414 Collectively our data indicates that nucleotide biosynthesis and carbohydrate  
415 metabolism are critical metabolic pathways for the proliferation and survival of *E. faecium* in  
416 the bloodstream. The proteins encoded by the genes required for growth in human serum that  
417 were identified in this study, could serve as candidates for the development of novel anti-  
418 infectives for the treatment of bloodstream-infections by multi-drug resistant *E. faecium*.

419

420 **References**

- 421
- 422 1. Dupont,H., Friggeri,A., Touzeau,J., Airapetian,N., Tinturier,F., Lobjoie,E., Lorne,E.,  
423 Hijazi,M., Régimbeau,J.-M. and Mahjoub,Y. (2011) Enterococci increase the  
424 morbidity and mortality associated with severe intra-abdominal infections in elderly  
425 patients hospitalized in the intensive care unit. *J. Antimicrob. Chemother.*, **66**, 2379–  
426 2385.
- 427 2. Guzman Prieto,A.M., van Schaik,W., Rogers,M.R.C., Coque,T.M., Baquero,F., Corander,J.  
428 and Willems,R.J.L. (2016) Global emergence and dissemination of enterococci as  
429 nosocomial pathogens: attack of the clones? *Front. Microbiol.*, **7**, 788.
- 430 3. Arias,C.A. and Murray,B.E. (2012) The rise of the *Enterococcus*: beyond vancomycin  
431 resistance. *Nat. Rev. Microbiol.*, **10**, 266–278.
- 432 4. Lebreton,F., van Schaik,W., Manson McGuire,A., Godfrey,P., Griggs,A., Mazumdar,V.,  
433 Corander,J., Cheng,L., Saif,S., Young,S., *et al.* (2013) Emergence of epidemic  
434 multidrug-resistant *Enterococcus faecium* from animal and commensal strains. *mBio*,  
435 **4**, e00534-13.
- 436 5. Zhang,X., Top,J., de Been,M., Bierschenk,D., Rogers,M., Leendertse,M., Bonten,M.J.M.,  
437 van der Poll,T., Willems,R.J.L. and van Schaik,W. (2013) Identification of a genetic  
438 determinant in clinical *Enterococcus faecium* strains that contributes to intestinal  
439 colonization during antibiotic treatment. *J. Infect. Dis.*, **207**, 1780–1786.
- 440 6. Heikens,E., Singh,K.V., Jacques-Palaz,K.D., van Luit-Asbroek,M., Oostdijk,E.A.N.,  
441 Bonten,M.J.M., Murray,B.E. and Willems,R.J.L. (2011) Contribution of the  
442 enterococcal surface protein Esp to pathogenesis of *Enterococcus faecium*  
443 endocarditis. *Microbes Infect.*, **13**, 1185–1190.
- 444 7. Paganelli,F.L., Huebner,J., Singh,K.V., Zhang,X., van Schaik,W., Wobser,D., Braat,J.C.,  
445 Murray,B.E., Bonten,M.J.M., Willems,R.J.L., *et al.* (2016) Genome-wide screening  
446 identifies phosphotransferase system permease BepA to be Involved in *Enterococcus*  
447 *faecium* endocarditis and biofilm formation. *J. Infect. Dis.*, **214**, 189–195.
- 448 8. Sillanpää,J., Prakash,V.P., Nallapareddy,S.R. and Murray,B.E. (2009) Distribution of genes  
449 encoding MSCRAMMs and pili in clinical and natural populations of *Enterococcus*  
450 *faecium*. *J. Clin. Microbiol.*, **47**, 896–901.
- 451 9. Montealegre,M.C., Singh,K.V., Somarajan,S.R., Yadav,P., Chang,C., Spencer,R.,  
452 Sillanpää,J., Ton-That,H. and Murray,B.E. (2016) Role of the Emp pilus subunits of  
453 *Enterococcus faecium* in biofilm formation, adherence to host extracellular matrix  
454 components, and experimental infection. *Infect. Immun.*, **84**, 1491–1500.
- 455 10. Kamboj,M., Blair,R., Bell,N., Sun,J., Eagan,J. and Sepkowitz,K. (2014) What is the  
456 source of bloodstream infection due to vancomycin-resistant enterococci in persons  
457 with mucosal barrier injury? *Infect. Control Hosp. Epidemiol.*, **35**, 99–101.
- 458 11. Bouza,E., Kestler,M., Beca,T., Mariscal,G., Rodríguez-Crélixems,M., Bermejo,J.,  
459 Fernández-Cruz,A., Fernández-Avilés,F., Muñoz,P. and Grupo de Apoyo al Manejo

- 460 de la Endocarditis (2015) The NOVA score: a proposal to reduce the need for  
461 transesophageal echocardiography in patients with enterococcal bacteremia. *Clin.*  
462 *Infect. Dis.*, **60**, 528–535.
- 463 12. Arias,C.A. and Murray,B.E. (2008) Emergence and management of drug-resistant  
464 enterococcal infections. *Expert Rev. Anti Infect. Ther.*, **6**, 637–655.
- 465 13. Coombs,G.W., Pearson,J.C., Daly,D.A., Le,T.T., Robinson,J.O., Gottlieb,T.,  
466 Howden,B.P., Johnson,P.D.R., Bennett,C.M., Stinear,T.P., *et al.* (2014) Australian  
467 enterococcal sepsis outcome programme annual report, 2013. *Commun. Dis. Intell. Q.*  
468 *Rep.*, **38**, E320-326.
- 469 14. de Kraker,M.E.A., Jarlier,V., Monen,J.C.M., Heuer,O.E., van de Sande,N. and  
470 Grundmann,H. (2013) The changing epidemiology of bacteraemias in Europe: trends  
471 from the European Antimicrobial Resistance Surveillance System. *Clin. Microbiol.*  
472 *Infect.*, **19**, 860–868.
- 473 15. Hidron,A.I., Edwards,J.R., Patel,J., Horan,T.C., Sievert,D.M., Pollock,D.A., Fridkin,S.K.,  
474 National Healthcare Safety Network Team and Participating National Healthcare  
475 Safety Network Facilities (2008) NHSN annual update: antimicrobial-resistant  
476 pathogens associated with healthcare-associated infections: annual summary of data  
477 reported to the National Healthcare Safety Network at the Centers for Disease Control  
478 and Prevention, 2006-2007. *Infect. Control Hosp. Epidemiol.*, **29**, 996–1011.
- 479 16. Krebs,H.A. (1950) Chemical composition of blood plasma and serum. *Annu. Rev.*  
480 *Biochem.*, **19**, 409–430.
- 481 17. van Opijnen,T. and Camilli,A. (2013) Transposon insertion sequencing: a new tool for  
482 systems-level analysis of microorganisms. *Nat. Rev. Microbiol.*, **11**, 435–442.
- 483 18. Barquist,L., Boinett,C.J. and Cain,A.K. (2013) Approaches to querying bacterial genomes  
484 with transposon-insertion sequencing. *RNA Biol.*, **10**, 1161–1169.
- 485 19. Zhang,X., Paganelli,F.L., Bierschenk,D., Kuipers,A., Bonten,M.J.M., Willems,R.J.L. and  
486 van Schaik,W. (2012) Genome-wide identification of ampicillin resistance  
487 determinants in *Enterococcus faecium*. *PLoS Genet.*, **8**, e1002804.
- 488 20. Zhang,X., Bierschenk,D., Top,J., Anastasiou,I., Bonten,M.J., Willems,R.J. and van  
489 Schaik,W. (2013) Functional genomic analysis of bile salt resistance in *Enterococcus*  
490 *faecium*. *BMC Genomics*, **14**, 299.
- 491 21. van Opijnen,T., Bodi,K.L. and Camilli,A. (2009) Tn-seq: high-throughput parallel  
492 sequencing for fitness and genetic interaction studies in microorganisms. *Nat.*  
493 *Methods*, **6**, 767–772.
- 494 22. Langridge,G.C., Phan,M.-D., Turner,D.J., Perkins,T.T., Parts,L., Haase,J., Charles,I.,  
495 Maskell,D.J., Peters,S.E., Dougan,G., *et al.* (2009) Simultaneous assay of every  
496 *Salmonella Typhi* gene using one million transposon mutants. *Genome Res.*, **19**, 2308–  
497 2316.
- 498 23. van Opijnen,T., Lazinski,D.W. and Camilli,A. (2015) Genome-wide fitness and genetic  
499 interactions determined by Tn-seq, a high-throughput massively parallel sequencing

- 500 method for microorganisms. In Coico,R., McBride,A., Quarles,J.M., Stevenson,B.,  
501 Taylor,R.K. (eds), *Current Protocols in Microbiology*. John Wiley & Sons, Inc.,  
502 Hoboken, NJ, USA, p. 1E.3.1-1E.3.24.
- 503 24. Mascini,E.M., Troelstra,A., Beitsma,M., Blok,H.E.M., Jalink,K.P., Hopmans,T.E.M.,  
504 Fluit,A.C., Hene,R.J., Willems,R.J.L., Verhoef,J., *et al.* (2006) Genotyping and  
505 preemptive isolation to control an outbreak of vancomycin-resistant *Enterococcus*  
506 *faecium*. *Clin. Infect. Dis.*, **42**, 739–746.
- 507 25. Leavis,H.L., Willems,R.J.L., van Wamel,W.J.B., Schuren,F.H., Caspers,M.P.M. and  
508 Bonten,M.J.M. (2007) Insertion sequence-driven diversification creates a globally  
509 dispersed emerging multiresistant subspecies of *E. faecium*. *PLoS Pathog.*, **3**, e7.
- 510 26. Goldberg,S.M.D., Johnson,J., Busam,D., Feldblyum,T., Ferriera,S., Friedman,R.,  
511 Halpern,A., Khouri,H., Kravitz,S.A., Lauro,F.M., *et al.* (2006) A  
512 Sanger/pyrosequencing hybrid approach for the generation of high-quality draft  
513 assemblies of marine microbial genomes. *Proc. Natl. Acad. Sci. U. S. A.*, **103**, 11240–  
514 11245.
- 515 27. Li,H. and Durbin,R. (2009) Fast and accurate short read alignment with Burrows-Wheeler  
516 transform. *Bioinformatics*, **25**, 1754–1760.
- 517 28. Tanimoto,K. and Ike,Y. (2008) Complete nucleotide sequencing and analysis of the 65-kb  
518 highly conjugative *Enterococcus faecium* plasmid pMG1: identification of the  
519 transfer-related region and the minimum region required for replication. *FEMS*  
520 *Microbiol. Lett.*, **288**, 186–195.
- 521 29. Bankevich,A., Nurk,S., Antipov,D., Gurevich,A.A., Dvorkin,M., Kulikov,A.S.,  
522 Lesin,V.M., Nikolenko,S.I., Pham,S., Prjibelski,A.D., *et al.* (2012) SPAdes: a new  
523 genome assembly algorithm and its applications to single-cell sequencing. *J. Comput.*  
524 *Biol.*, **19**, 455–477.
- 525 30. Li,H., Handsaker,B., Wysoker,A., Fennell,T., Ruan,J., Homer,N., Marth,G., Abecasis,G.,  
526 Durbin,R. and 1000 Genome Project Data Processing Subgroup (2009) The sequence  
527 alignment/map format and SAMtools. *Bioinformatics*, **25**, 2078–2079.
- 528 31. Seemann,T. (2014) Prokka: rapid prokaryotic genome annotation. *Bioinformatics*, **30**,  
529 2068–2069.
- 530 32. McClure,R., Balasubramanian,D., Sun,Y., Bobrovskyy,M., Sumbly,P., Genco,C.A.,  
531 Vanderpool,C.K. and Tjaden,B. (2013) Computational analysis of bacterial RNA-Seq  
532 data. *Nucleic Acids Res.*, **41**, e140.
- 533 33. Burghout,P., Zomer,A., van der Gaast-de Jongh,C.E., Janssen-Megens,E.M., Françoijis,K.-  
534 J., Stunnenberg,H.G. and Hermans,P.W.M. (2013) *Streptococcus pneumoniae* folate  
535 biosynthesis responds to environmental CO<sub>2</sub> levels. *J. Bacteriol.*, **195**, 1573–1582.
- 536 34. Goecks,J., Nekrutenko,A., Taylor,J. and Galaxy Team (2010) Galaxy: a comprehensive  
537 approach for supporting accessible, reproducible, and transparent computational  
538 research in the life sciences. *Genome Biol.*, **11**, R86.



- 539 35. Langmead,B. and Salzberg,S.L. (2012) Fast gapped-read alignment with Bowtie 2. *Nat.*  
540 *Methods*, **9**, 357–359.
- 541 36. Robinson,J.T., Thorvaldsdóttir,H., Winckler,W., Guttman,M., Lander,E.S., Getz,G. and  
542 Mesirov,J.P. (2011) Integrative genomics viewer. *Nat. Biotechnol.*, **29**, 24–26.
- 543 37. Baldi,P. and Long,A.D. (2001) A Bayesian framework for the analysis of microarray  
544 expression data: regularized t -test and statistical inferences of gene changes.  
545 *Bioinformatics*, **17**, 509–519.
- 546 38. Pritchard,J.R., Chao,M.C., Abel,S., Davis,B.M., Baranowski,C., Zhang,Y.J., Rubin,E.J.  
547 and Waldor,M.K. (2014) ARTIST: high-resolution genome-wide assessment of fitness  
548 using transposon-insertion sequencing. *PLoS Genet.*, **10**, e1004782.
- 549 39. Prajsnar,T.K., Cunliffe,V.T., Foster,S.J. and Renshaw,S.A. (2008) A novel vertebrate  
550 model of *Staphylococcus aureus* infection reveals phagocyte-dependent resistance of  
551 zebrafish to non-host specialized pathogens. *Cell. Microbiol.*, **10**, 2312–2325.
- 552 40. Laarman,A.J., Bardoel,B.W., Ruyken,M., Fernie,J., Milder,F.J., van Strijp,J.A.G. and  
553 Rooijackers,S.H.M. (2012) *Pseudomonas aeruginosa* alkaline protease blocks  
554 complement activation via the classical and lectin pathways. *J. Immunol.*, **188**, 386–  
555 393.
- 556 41. Berends,E.T.M., Dekkers,J.F., Nijland,R., Kuipers,A., Soppe,J.A., van Strijp,J.A.G. and  
557 Rooijackers,S.H.M. (2013) Distinct localization of the complement C5b-9 complex on  
558 Gram-positive bacteria. *Cell. Microbiol.*, **15**, 1955–1968.
- 559 42. Pence,M.A., Rooijackers,S.H.M., Cogen,A.L., Cole,J.N., Hollands,A., Gallo,R.L. and  
560 Nizet,V. (2010) Streptococcal inhibitor of complement promotes innate immune  
561 resistance phenotypes of invasive MIT1 Group A *Streptococcus*. *J. Innate Immun.*, **2**,  
562 587–595.
- 563 43. Prajsnar,T.K., Renshaw,S.A., Ogryzko,N.V., Foster,S.J., Serror,P. and Mesnage,S. (2013)  
564 Zebrafish as a novel vertebrate model to dissect enterococcal pathogenesis. *Infect.*  
565 *Immun.*, **81**, 4271–4279.
- 566 44. Samant,S., Lee,H., Ghassemi,M., Chen,J., Cook,J.L., Mankin,A.S. and Neyfakh,A.A.  
567 (2008) Nucleotide biosynthesis is critical for growth of bacteria in human blood. *PLoS*  
568 *Pathog.*, **4**, e37.
- 569 45. Le Breton,Y., Mistry,P., Valdes,K.M., Quigley,J., Kumar,N., Tettelin,H. and McIver,K.S.  
570 (2013) Genome-wide identification of genes required for fitness of group A  
571 *Streptococcus* in human blood. *Infect. Immun.*, **81**, 862–875.
- 572 46. Jenkins,A., Cote,C., Twenhafel,N., Merkel,T., Bozue,J. and Welkos,S. (2011) Role of  
573 purine biosynthesis in *Bacillus anthracis* pathogenesis and virulence. *Infect. Immun.*,  
574 **79**, 153–166.
- 575 47. Polissi,A., Pontiggia,A., Feger,G., Altieri,M., Mottl,H., Ferrari,L. and Simon,D. (1998)  
576 Large-scale identification of virulence genes from *Streptococcus pneumoniae*. *Infect.*  
577 *Immun.*, **66**, 5620–5629.

- 578 48. Wang,N., Ozer,E.A., Mandel,M.J. and Hauser,A.R. (2014) Genome-wide identification of  
579 *Acinetobacter baumannii* genes necessary for persistence in the lung. *mBio*, **5**,  
580 e01163-01114.
- 581 49. Fuller,T.E., Kennedy,M.J. and Lowery,D.E. (2000) Identification of *Pasteurella*  
582 *multocida* virulence genes in a septicemic mouse model using signature-tagged  
583 mutagenesis. *Microb. Pathog.*, **29**, 25–38.
- 584 50. Schwager,S., Agnoli,K., Kothe,M., Feldmann,F., Givskov,M., Carlier,A. and Eberl,L.  
585 (2013) Identification of *Burkholderia cenocepacia* strain H111 virulence factors using  
586 nonmammalian infection hosts. *Infect. Immun.*, **81**, 143–153.
- 587 51. Chaudhuri,R.R., Peters,S.E., Pleasance,S.J., Northen,H., Willers,C., Paterson,G.K.,  
588 Cone,D.B., Allen,A.G., Owen,P.J., Shalom,G., *et al.* (2009) Comprehensive  
589 identification of *Salmonella enterica* serovar Typhimurium genes required for  
590 infection of BALB/c mice. *PLoS Pathog.*, **5**, e1000529.
- 591 52. Mulhbacher,J., Brouillette,E., Allard,M., Fortier,L.-C., Malouin,F. and Lafontaine,D.A.  
592 (2010) Novel riboswitch ligand analogs as selective inhibitors of guanine-related  
593 metabolic pathways. *PLoS Pathog.*, **6**, e1000865.
- 594 53. Mainardi,J.-L., Fourgeaud,M., Hugonnet,J.-E., Dubost,L., Brouard,J.-P., Ouazzani,J.,  
595 Rice,L.B., Gutmann,L. and Arthur,M. (2005) A novel peptidoglycan cross-linking  
596 enzyme for a beta-lactam-resistant transpeptidation pathway. *J. Biol. Chem.*, **280**,  
597 38146–38152.
- 598 54. Theilacker,C., Sava,I., Sanchez-Carballo,P., Bao,Y., Kropec,A., Grohmann,E., Holst,O.  
599 and Huebner,J. (2011) Deletion of the glycosyltransferase *bgsB* of *Enterococcus*  
600 *faecalis* leads to a complete loss of glycolipids from the cell membrane and to  
601 impaired biofilm formation. *BMC Microbiol.*, **11**, 67.
- 602 55. Davlieva,M., Zhang,W., Arias,C.A. and Shamooy,Y. (2013) Biochemical characterization  
603 of cardiolipin synthase mutations associated with daptomycin resistance in  
604 enterococci. *Antimicrob. Agents Chemother.*, **57**, 289–296.
- 605 56. Vollmer,W., Joris,B., Charlier,P. and Foster,S. (2008) Bacterial peptidoglycan (murein)  
606 hydrolases. *FEMS Microbiol. Rev.*, **32**, 259–286.
- 607 57. Mikalsen,T., Pedersen,T., Willems,R., Coque,T.M., Werner,G., Sadowy,E., van  
608 Schaik,W., Jensen,L.B., Sundsfjord,A. and Hegstad,K. (2015) Investigating the  
609 mobilome in clinically important lineages of *Enterococcus faecium* and *Enterococcus*  
610 *faecalis*. *BMC Genomics*, **16**, 282.
- 611 58. van Schaik,W., Top,J., Riley,D.R., Boekhorst,J., Vrijenhoek,J.E.P., Schapendonk,C.M.E.,  
612 Hendrickx,A.P.A., Nijman,I.J., Bonten,M.J.M., Tettelin,H., *et al.* (2010)  
613 Pyrosequencing-based comparative genome analysis of the nosocomial pathogen  
614 *Enterococcus faecium* and identification of a large transferable pathogenicity island.  
615 *BMC Genomics*, **11**, 239.
- 616 59. Matos,R.C., Lapaque,N., Rigottier-Gois,L., Debarbieux,L., Meylheuc,T., Gonzalez-  
617 Zorn,B., Repoila,F., Lopes,M. de F. and Serror,P. (2013) *Enterococcus faecalis*  
618 prophage dynamics and contributions to pathogenic traits. *PLoS Genet.*, **9**, e1003539.



619 60. Duerkop, B.A., Clements, C.V., Rollins, D., Rodrigues, J.L.M. and Hooper, L.V. (2012) A  
620 composite bacteriophage alters colonization by an intestinal commensal bacterium.  
621 *Proc. Natl. Acad. Sci.*, **109**, 17621–17626.

622

623 **Acknowledgements**

624 This work was supported by the European Union Seventh Framework Programme (FP7-  
625 HEALTH-2011-single-stage) “Evolution and Transfer of Antibiotic Resistance” (EvoTAR)  
626 under grant agreement number 282004 and by an NWO-VENI grant (916.86.044) and NWO-  
627 VIDI grant (917.13.357) to W.v.S.

628

629

630 **Author contributions**

631

632 X.Z, R.J.L.W. and W.v.S. designed the study. X.Z., A.M.G.P., T.K.P., M.B., J.R.B., M.R. and

633 S.M. performed experiments. All authors contributed to data interpretation. The manuscript

634 was written by Z.X., A.M.G.P., M.J.M.B., R.J.L.W. and W.v.S.

635 **Figures**

636

637 **Figure 1: Coverage plots of RNA-seq data aligning to chromosome and plasmid DNA.**

638 The y axis of each track indicates reads coverage and is represented on a log scale, ranging  
639 from 0 to 10000. The x axis represents the genomic location. Light blue (BHI) or orange  
640 (serum) tracks correspond to sequencing reads aligned to the plus strand of the replicon, and  
641 dark blue (BHI) or dark red (serum) tracks correspond to sequencing reads aligned to the  
642 minus strand of the replicon. The grey track corresponds to multi-gene operons. The green  
643 track corresponds to differentially expressed genes (BHI vs serum), with the height of the  
644 green bars indicative of differential expression. In panels B and C, two serum-induced  
645 regions are shown, i.e. a gene cluster involved in nucleotide biosynthesis (panel B) and a  
646 prophage (panel C). The RNA-seq experiments were performed using three biological  
647 replicates.

648

649 **Figure 2: Tn-seq analysis for *E. faecium* genes required for growth in human serum.**

650 Bubbles represent genes, and bubble size corresponds to the fold-changes (for visual reasons,  
651 a 100-fold change in transposon mutant abundance is set as a maximum) derived from the  
652 read-count ratio of libraries grown in BHI to libraries grown in human serum. On the x axis  
653 genes are shown in order of their genomic location and the chromosome and plasmids are  
654 indicated. The outcome of statistical analysis of the Tn-seq data is indicated on the y axis.  
655 Genes with a significant change ( $q < 0.05$ ) in fitness in serum versus BHI are grouped by  
656 function and are labelled with different colors, and the name or locus tag and the change in  
657 abundance between the control condition and growth in serum is indicated next to the  
658 bubbles. Negative values indicate that mutants in these genes outgrow other mutants in serum,  
659 suggesting that these mutants, compared to the wild-type E745, have a higher fitness in  
660 serum.

661

662 **Figure 3: *E. faecium* transposon mutants with a growth defect in human serum and an**

663 **attenuated phenotype in a zebrafish model.** (A) Ratios of the viable counts of five mutants

664 compared to wild-type *E. faecium* before (blue bars) and after 24 h of growth in human serum

665 (red bars) or BHI (yellow bars). The viable counts of wild-type *E. faecium* E745 were  $(3.52 \pm$

666  $0.07) \times 10^5/\text{ml}$  in the inocula,  $(2.92 \pm 0.14) \times 10^8/\text{ml}$  after 24 h of growth in serum and  $(1.20 \pm$

667  $0.20) \times 10^9/\text{ml}$  after 24 h of growth in BHI, respectively. Error bars represent the standard

668 deviation of the mean of three independent experiments. Asterisks represent significant

669 difference (\*:  $p < 10^{-3}$ , \*\*:  $p < 10^{-5}$  as determined by a two-tailed Student's *t*-test) between the

670 mutant strains and wild-type. (B) Kaplan-Meier survival curves of zebrafish embryos upon

671 infection with *E. faecium*. The virulence of *E. faecium* mutants upon intravenous infection of

672 zebrafish embryos was determined upon injection with  $1.2 \times 10^4$  cfu of the *manY\_2::Gm* and

673 *pyrK::Gm* transposon mutants and wild-type *E. faecium* E745. The experiment was performed

674 three times and the mutants were significantly different ( $p < 0.01$ ) from the wild-type in each

675 experiment as determined by the Log-rank (Mantel-Cox) test with Bonferroni correction for

676 multiple comparisons. This figure represents the combined results of the three replicates for

677 *E. faecium* E745 ( $n = 93$  zebrafish embryos), *manY\_2::Gm* ( $n = 92$ ) and *pyrK::Gm* ( $n = 90$ ).

678

679

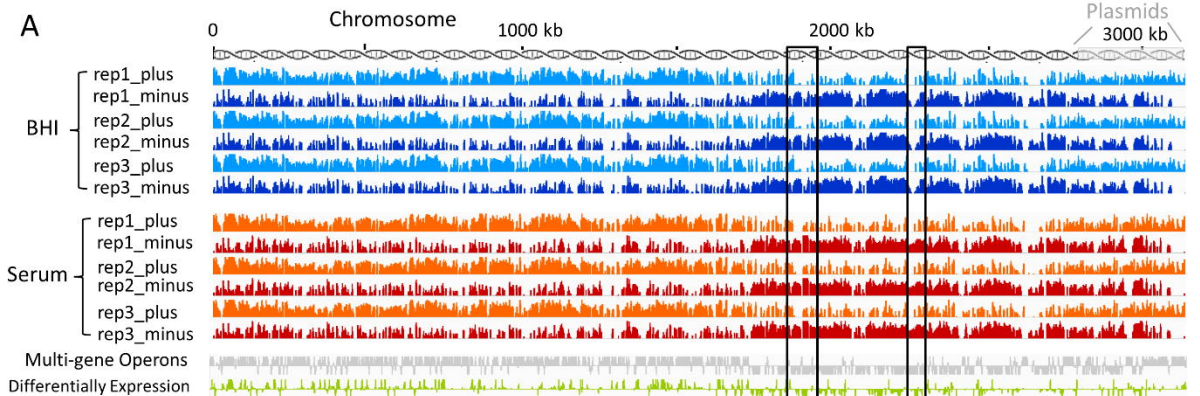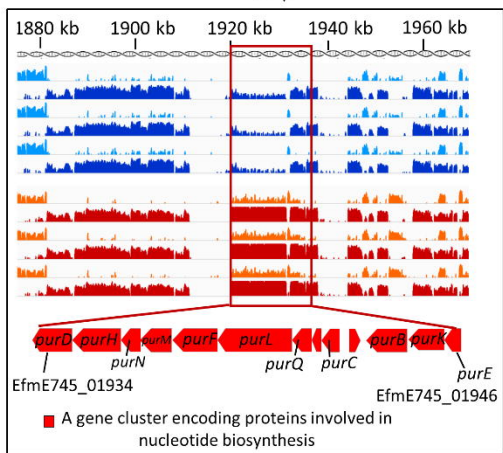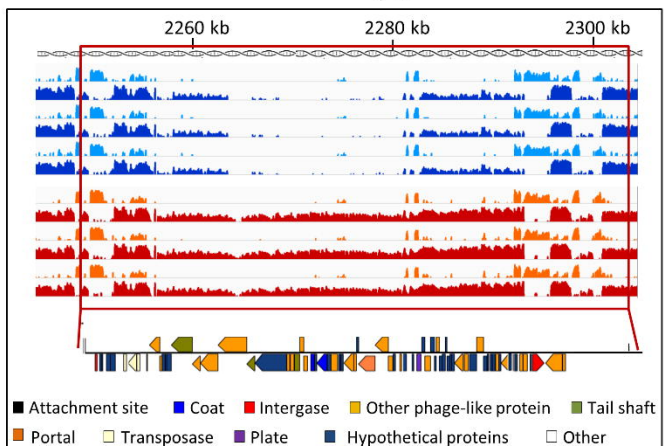

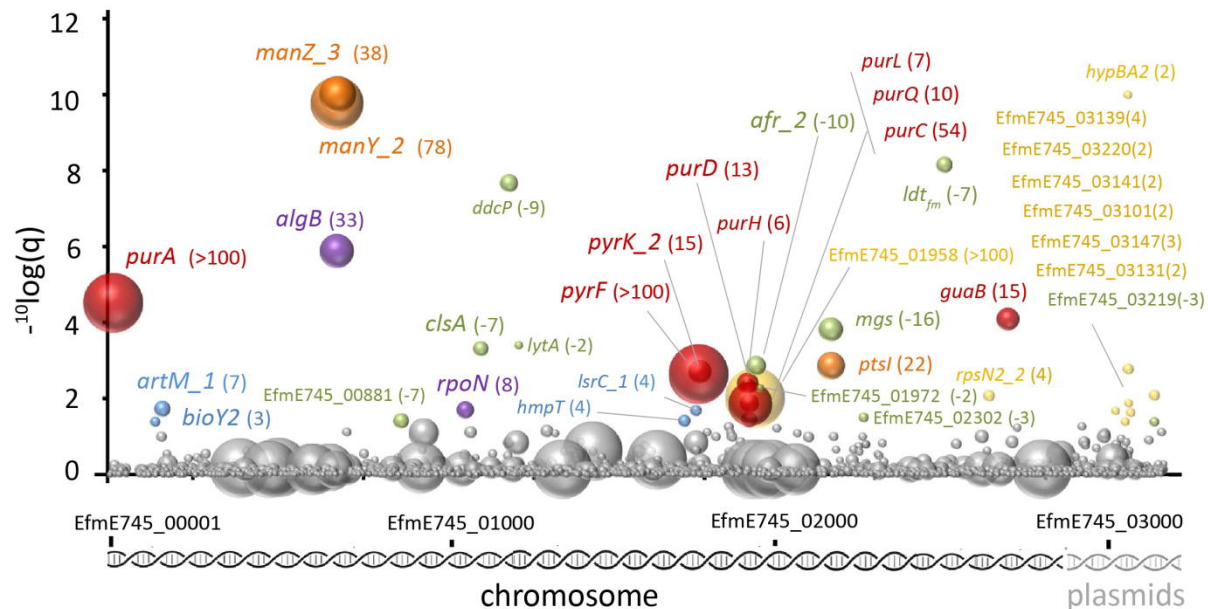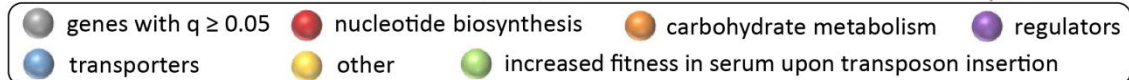

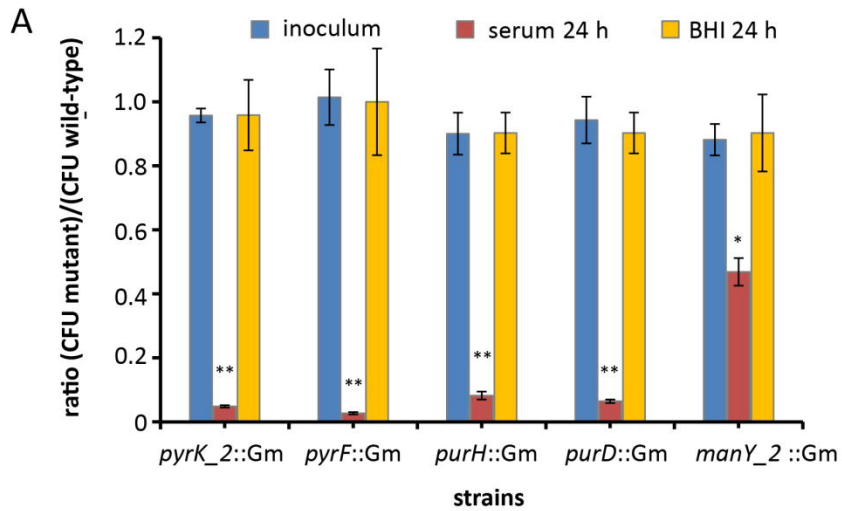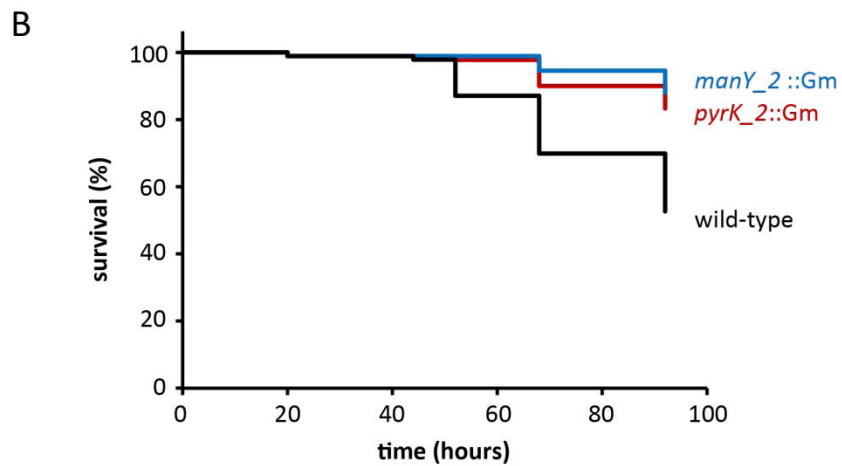

Source: https://www.biorxiv.org/content/10.1101/101329.full.pdf
